# Supplementary material for: Effect of Moderate to Severe Hepatic Steatosis on Vaccine Immunogenicity against Wild-Type and Mutant Virus and COVID-19 Infection among BNT162b2 Recipients
Source: MDPI journal article supplement (doi:10.3390/vaccines11030497), 2023-02-21
Supplement: s1 [file s1]

**Figure S1. Seroconversion rate of D21, D56, D180 between NAFLD and control groups for different SARS-CoV-2 variants**

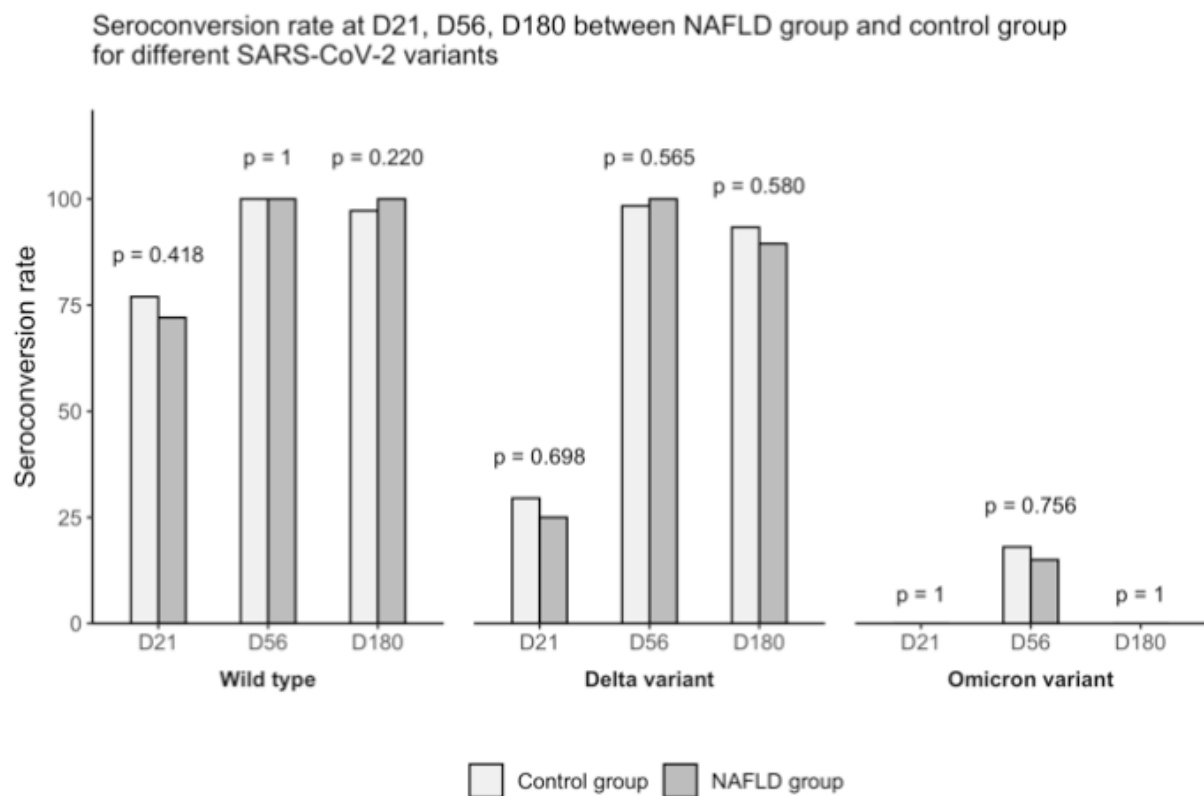

Figure S2. vMN GMT at D21, D56, D180 between NAFLD and control groups for different SARS-CoV-2 variants

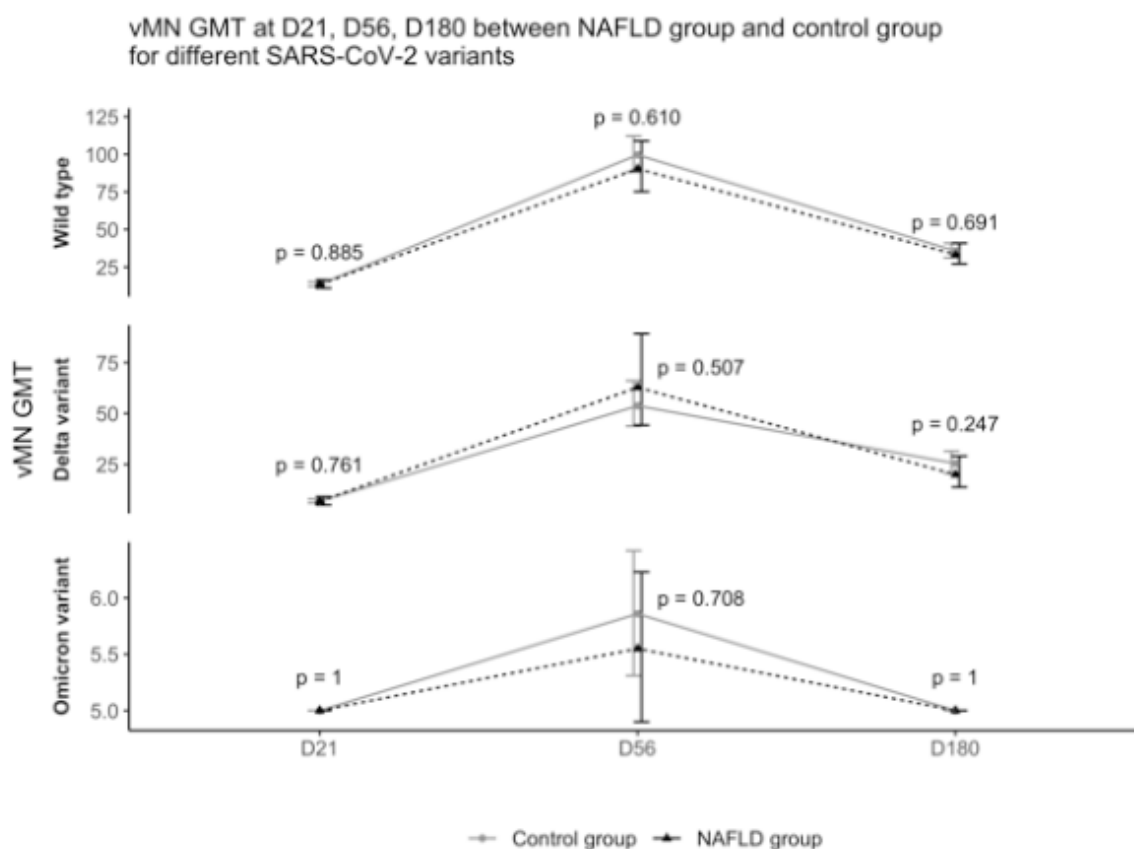

Table S1. Antibody responses to SARS-CoV-2 (wild type, delta variant, omicron variant) among BNT162b2 recipients (sensitivity analysis)

|                              | NAFLD <sup>#</sup>        | Control <sup>#</sup>        | P-value |
|------------------------------|---------------------------|-----------------------------|---------|
| <b>Wild type</b>             |                           |                             |         |
| <u>Seroconversion rate</u> * |                           |                             |         |
| D21                          | 74/99 (74.7)              | 122/160 (76.3)              | 0.784   |
| D56                          | 99/99 (100)               | 158/158 (100) <sup>^</sup>  | 1       |
| D180                         | 79/79 (100) <sup>^</sup>  | 114/118 (96.6) <sup>^</sup> | 0.098   |
| <u>vMN GMT</u>               |                           |                             |         |
| D21                          | 14.29 (12.06-16.95)       | 13.08 (11.59-14.73)         | 0.456   |
| D56                          | 96.65 (83.10-112.17)      | 97.46 (84.78-112.17)        | 0.704   |
| D180                         | 36.00 (30.57-42.52)       | 34.33 (29.37-40.04)         | 0.656   |
| <b>Delta variant</b>         |                           |                             |         |
| <u>Seroconversion rate</u> * |                           |                             |         |
| D21                          | 8/32 (25)                 | 15/49 (30.6)                | 0.584   |
| D56                          | 32/32 (100)               | 48/49 (98.0)                | 0.416   |
| D180                         | 29/31 (93.5) <sup>^</sup> | 44/48 (91.7) <sup>^</sup>   | 0.758   |
| <u>vMN GMT</u>               |                           |                             |         |

|                                     |                     |                     |       |
|-------------------------------------|---------------------|---------------------|-------|
| D21                                 | 6.77 (5.47-8.33)    | 7.02 (5.99-8.25)    | 0.647 |
| D56                                 | 60.37 (46.53-78.26) | 53.08 (41.68-68.03) | 0.614 |
| D180                                | 21.87 (16.78-28.50) | 25.56 (19.89-32.79) | 0.374 |
| <b><i>Omicron variant</i></b>       |                     |                     |       |
| <b><i>Seroconversion rate *</i></b> |                     |                     |       |
| D21                                 | 0/32 (0)            | 0/49 (0)            | 1     |
| D56                                 | 5/32 (15.6)         | 9/49 (18.4)         | 0.750 |
| D180                                | 0/31 (0)^           | 0/48 (0)^           | 1     |
| <b><i>vMN GMT</i></b>               |                     |                     |       |
| D21                                 | UD (UD)             | UD (UD)             | 1     |
| D56                                 | UD (UD)             | UD (UD)             | 1     |
| D180                                | UD (UD)             | UD (UD)             | 1     |

Note: Data are displayed as median (interquartile range) and number (%), ^data not available were excluded.

Abbreviations: NAFLD, non-alcoholic fatty liver disease

\*Seroconversion rate was considered as positive if MN titre  $\geq 10$ .

#Sensitivity analysis was performed by reclassifying subjects with mild hepatic steatosis into NAFLD group

**Table S2. Comparison of seroconversion rate of neutralizing antibody to SARS-CoV-2 wild type between infected and non-infected subjects\***

|       | <b>Infected (n=55)</b> | <b>Non-infected (n=200)</b> | <b>P-value</b> |
|-------|------------------------|-----------------------------|----------------|
| D21   | 42/55 (76.4)           | 152/200 (76.0)              | 0.956          |
| D56^  | 54/54 (100)            | 199/199 (100)               | 1              |
| D180# | 42/43 (97.7)           | 148/151 (98.0)              | 0.890          |

Note: Data are displayed as number (%), ^data not available were excluded.

\* missing data of infection outcome in 4 subjects

^D56: missing data of seroconversion in 2 subjects

#D180: missing data of seroconversion in 61 subjects

**Table S3. Adverse reactions after either dose of BNT162b2**

|                                                                      | <b>All<br/>(n=259)</b> | <b>Hepatic steatosis<br/>(n = 68)</b> | <b>Control<br/>(n = 191)</b> | <b>P-value</b> |
|----------------------------------------------------------------------|------------------------|---------------------------------------|------------------------------|----------------|
| <b><i>Total reactions within 7 days<br/>after each injection</i></b> |                        |                                       |                              |                |
| Any                                                                  | 240 (92.7)             | 63 (92.6)                             | 177 (92.7)                   | 0.343          |
| Grade 3 or above*                                                    | 0 (0)                  | 0 (0)                                 | 0 (0)                        | --             |
| <b><i>Injection site adverse reactions</i></b>                       |                        |                                       |                              |                |
| Pain                                                                 | 232 (89.6)             | 59 (86.8)                             | 173 (90.6)                   | 0.412          |
| Redness                                                              | 230 (88.9)             | 59 (86.8)                             | 171 (89.5)                   | 0.775          |
| Swelling                                                             | 40 (15.4)              | 12 (17.6)                             | 28 (14.7)                    | 0.531          |
| Itch                                                                 | 76 (29.3)              | 21 (30.9)                             | 55 (28.8)                    | 0.500          |
|                                                                      | 29 (11.2)              | 8 (11.8)                              | 21 (11.0)                    | 0.593          |
| <b><i>Systemic adverse reactions</i></b>                             |                        |                                       |                              |                |
| Fever                                                                | 174 (67.2)             | 52 (76.5)                             | 122 (63.9)                   | 0.231          |
| Chills and rigors                                                    | 48 (18.5)              | 16 (23.5)                             | 32 (16.8)                    | 0.469          |
| Muscle pain                                                          | 33 (12.7)              | 12 (17.6)                             | 21 (11.0)                    | <b>0.042</b>   |
|                                                                      |                        |                                       | 66 (34.6)                    | <b>0.075</b>   |

|                 |                         |                        |           |              |
|-----------------|-------------------------|------------------------|-----------|--------------|
| Joint pain      | 101 (39.0)<br>39 (15.1) | 35 (51.5)<br>12 (17.6) | 27 (14.1) | <b>0.026</b> |
| Headache        | 79 (30.5)               | 24 (35.3)              | 55 (28.8) | 0.639        |
| Fatigue         | 136 (52.5)              | 41 (60.3)              | 95 (49.7) | 0.118        |
| Nausea          | 19 (7.3)                | 6 (8.8)                | 13 (6.8)  | <b>0.027</b> |
| Vomiting        | 5 (1.9)                 | 2 (2.9)                | 3 (1.6)   | 0.244        |
| Diarrhoea       | 26 (10.0)               | 7 (10.3)               | 19 (9.9)  | 0.815        |
| Skin rash       | 11 (4.2)                | 3 (4.4)                | 8 (4.2)   | 0.624        |
| Facial drooping | 1 (0.4)                 | 0 (0)                  | 1 (0.5)   | 0.55         |

Note: Data are displayed as number (%).

\*Grade 3 or above: severe or life threatening reactions
